# Supplementary material for: Charge-transfer and isomerization reactions of trans-4-(N-arylamino)stilbenes
Source: Royal Society of Chemistry journal article supplement (doi:10.1039/c6cp05514a), 2016-01-01
Supplement: c6cp05514a1.pdf [file c6cp05514a1.pdf]

# Charge Transfer and Isomerization Reactions of trans-4-(*N*-arylamino)stilbenes

*Hsuan-Hsiao Yao,<sup>a</sup> Hsu-Hsiang Cheng,<sup>a</sup> Cheng-Kai Lin,<sup>b</sup> Jye-Shane Yang<sup>b\*</sup> and I-*

*Chia Chen<sup>a\*</sup>*

<sup>a</sup>*Department of Chemistry, National Tsing Hua University, Hsinchu, Taiwan 30013,*

*Republic of China*

<sup>b</sup>*Department of Chemistry, National Taiwan University, Taipei, Taiwan 10617,*

*Republic of China*

Supporting Information: absorption, emission spectra, TCSPC, transient absorption curves and computational results.

## Content

- (a) Absorption, emission spectra and Lippert-Mataga plots.
- (b) TCSPC and Transient absorption curves
- (c) Optimized structure, TD-DFT, and MO diagram using method PEB0 basis set 6-311G(d,p)

## Captions of Figures and Tables

(a)

Fig. S1. Absorption and fluorescence spectra of p1H, p1CN, and p1OM in various solvents.

Fig. S2. Lippert-Mataga plot of Stokes shift vs. orientation polarizability  $\Delta f$  for p1H.

Fig. S3. Lippert-Mataga plot of Stokes shift vs. orientation polarizability  $\Delta f$  for the (a) PICT, and (b) TICT bands of p1CN.

Fig. S4. Lippert-Mataga plot of Stokes shift vs. orientation polarizability  $\Delta f$  for the PICT band of p1OM.

.

Table S1. Peak positions in absorption  $\lambda_{\text{abs}}$ , emission  $\lambda_{\text{em}}$ , Stokes shift, and  $\Delta f$  of solvent for p1H in various solvents.

Table S2. Peak positions in absorption  $\lambda_{\text{abs}}$ , emission  $\lambda_{\text{em}}$ , Stokes shift, and  $\Delta f$  of solvent for p1CN in various solvents.

Table S3. Peak positions in absorption  $\lambda_{\text{abs}}$ , emission  $\lambda_{\text{em}}$ , Stokes shift, and  $\Delta f$  of solvent for p1OM in various solvents.

(b)

Fig. S5. TCSPC curves measured at emission wavelength 420 nm of p1H in various solvents as indicated.

Fig. S6. TCSPC curves measured at emission wavelength 420 nm of p1CN in various solvents as indicated.

Fig. S7. TCSPC curves measured at emission wavelength 580 nm of p1CN in various solvents as indicated.

Fig. S8. TCSPC curves measured at emission wavelength 420 nm of p1OM in various solvents as indicated.

Fig. S9. TCSPC curves measured at emission wavelength 580 nm of p1OM in various

solvents as indicated.

Fig. S10. Transient absorption spectra of p1H in various solvents as indicated.

Fig. S11. Transient absorption spectra of p1CN in various solvents as indicated.

Fig. S12. Transient absorption spectra of p1OM in various solvents as indicated.

(c)

Fig. S13. Calculated optimized molecular structure of p1H in solvent ACN in the ground state (a) and the PICT state (b).

Table S4. Dihedral angle and energy of p1H in solvent ACN.

Fig. S14. Calculated, optimized molecular structure of p1CN in solvent ACN in the ground state (a), the PICT state (b) and the TICT state (c),(d).

Table S5. Dihedral angle and energy of p1CN in solvent ACN.

Fig. S15. Calculated, optimized molecular structure of p1OM in solvent ACN in the ground state (a), the PICT state (b) and the TICT state (c),(d).

Table S6. Dihedral angle and energy of p1OM in solvent ACN.

Fig. S16. Molecular orbital diagram HOMO, LUMO, and LUMO+1 for p1H, p1CN, and p1OM.

Table S7. Vertical transition (eV) and oscillator strength (in parenthesis) of aminostilbenes in solvent ACN.

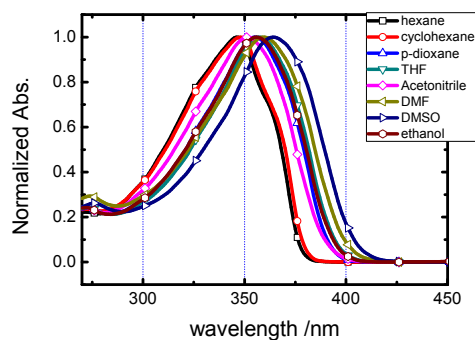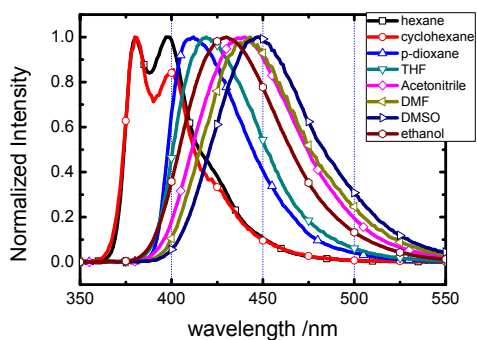

p1H

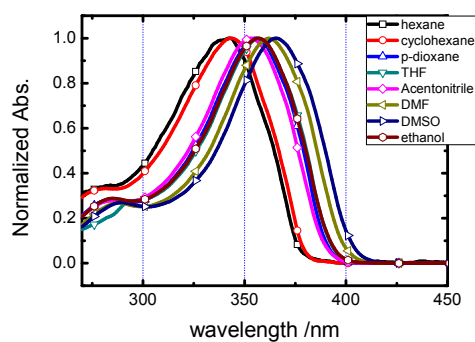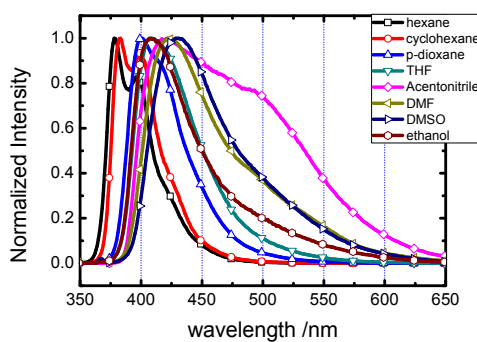

p1CN

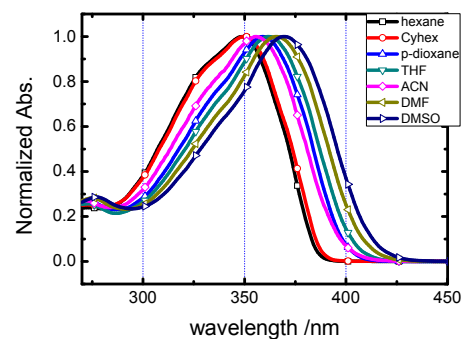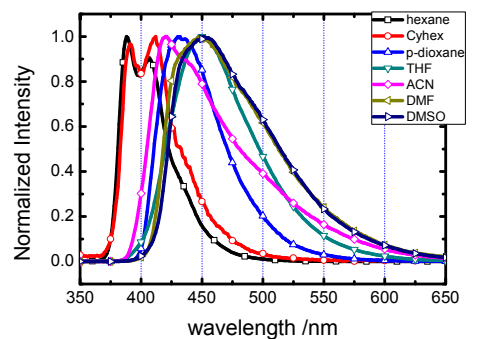

p1OM

Fig. S1. Absorption and fluorescence spectra of p1H, p1CN, and p1OM in various solvents.

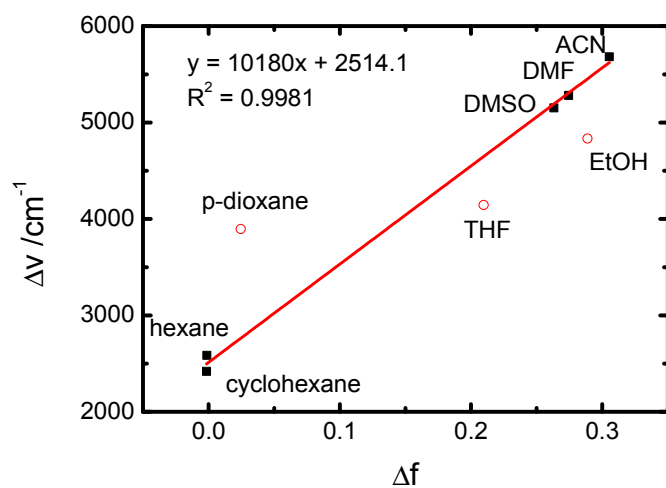

Fig. S2. Lippert-Mataga plot of Stokes shift vs. orientation polarizability  $\Delta f$  for p1H.

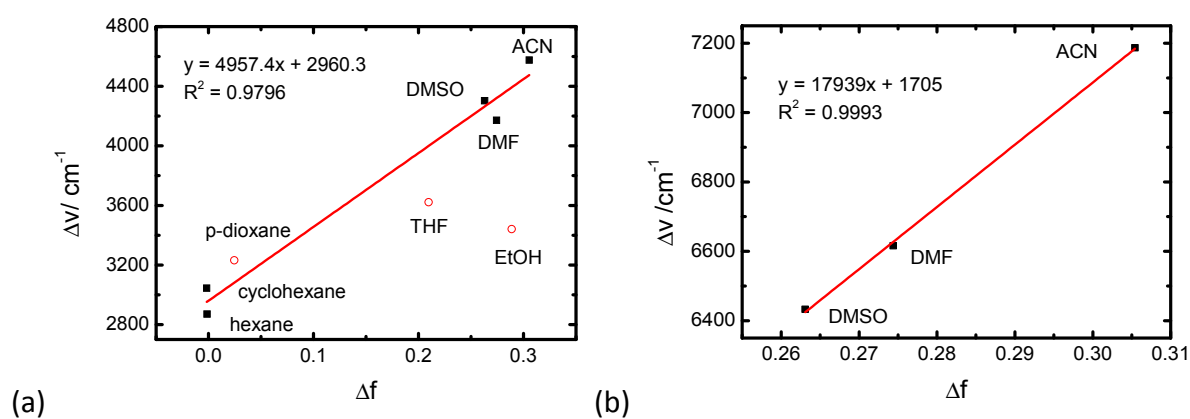

Fig. S3. Lippert-Mataga plot of Stokes shift vs. orientation polarizability  $\Delta f$  for the (a) PICT, and (b) TICT bands of p1CN.

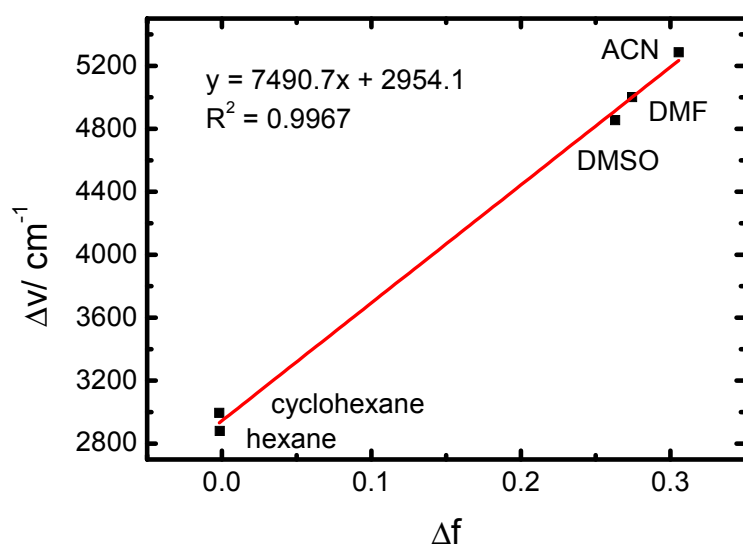

Fig. S4. Lippert-Mataga plot of Stokes shift vs. orientation polarizability  $\Delta f$  for the PICT band of p1OM.

Table S1. Peak positions in absorption  $\lambda_{\text{abs}}$ , emission  $\lambda_{\text{em}}$ , Stokes shift, and  $\Delta f$  of solvent for p1H in various solvents

| solvent      | $\lambda_{\text{abs}} / \text{nm}$ | $\lambda_{\text{em}} / \text{nm}$ | $\nu_{\text{abs}} - \nu_{\text{em}} / \text{cm}^{-1}$ | $\Delta f$ |
|--------------|------------------------------------|-----------------------------------|-------------------------------------------------------|------------|
| n-hexane     | 346                                | 380                               | 2586                                                  | -0.00136   |
| Cyclohexane  | 348                                | 380                               | 2420                                                  | -0.00165   |
| p-dioxane    | 355                                | 412                               | 3897                                                  | 0.024512   |
| THF          | 357                                | 419                               | 4145                                                  | 0.209572   |
| Acetonitrile | 352                                | 440                               | 5682                                                  | 0.305416   |
| DMF          | 359                                | 443                               | 5282                                                  | 0.274386   |
| DMSO         | 364                                | 448                               | 5151                                                  | 0.263087   |
| EtOH         | 356                                | 430                               | 4834                                                  | 0.288746   |

Table S2. Peak positions in absorption  $\lambda_{\text{abs}}$ , emission  $\lambda_{\text{em}}$ , Stokes shift, and  $\Delta f$  of solvent for p1CN in various solvents

| solvent      | $\lambda_{\text{abs}} / \text{nm}$ | $\lambda_{\text{em}} / \text{nm}$ | $\nu_{\text{abs}} - \nu_{\text{em}} / \text{cm}^{-1}$ | $\Delta f$ |
|--------------|------------------------------------|-----------------------------------|-------------------------------------------------------|------------|
| hexane       | 341                                | 378                               | 2870                                                  | -0.00136   |
| cyclohexane  | 343                                | 383                               | 3045                                                  | -0.00165   |
| p-dioxane    | 355                                | 401                               | 3416                                                  | 0.024512   |
| THF          | 357                                | 410                               | 4426                                                  | 0.209572   |
| Acetonitrile | 353                                | 421, 473                          | 4576, 7187                                            | 0.305416   |
| DMF          | 361                                | 425, 476                          | 4171, 6616                                            | 0.274386   |
| DMSO         | 365                                | 433, 477                          | 4303, 6433                                            | 0.263087   |
| EtOH         | 357                                | 407                               | 3441                                                  | 0.288746   |

Table S3. Peak positions in absorption  $\lambda_{\text{abs}}$ , emission  $\lambda_{\text{em}}$ , Stokes shift, and  $\Delta f$  of solvent for p1OM in various solvents<sup>a</sup>

| solvent      | $\lambda_{\text{abs}} / \text{nm}$ | $\lambda_{\text{em}} / \text{nm}$ | $\nu_{\text{abs}} - \nu_{\text{em}} / \text{cm}^{-1}$ | $\Delta f$ |
|--------------|------------------------------------|-----------------------------------|-------------------------------------------------------|------------|
| hexane       | 350                                | 388                               | 2880                                                  | -0.00136   |
| cyclohexane  | 349                                | 391                               | 2996                                                  | -0.00165   |
| p-dioxane    | 359                                | 432                               | 4707                                                  | 0.024512   |
| THF          | 362                                | 450                               | 5402                                                  | 0.209572   |
| Acetonitrile | 355                                | 420                               | 5286                                                  | 0.305416   |
| DMF          | 366                                | 449                               | 5001                                                  | 0.274386   |
| DMSO         | 370                                | 451                               | 4854                                                  | 0.263087   |
| EtOH         | 359                                | 444                               | 5332                                                  | 0.288746   |

a. The Stokes shift is for the PICT band and the TICT band position is hard to determine.

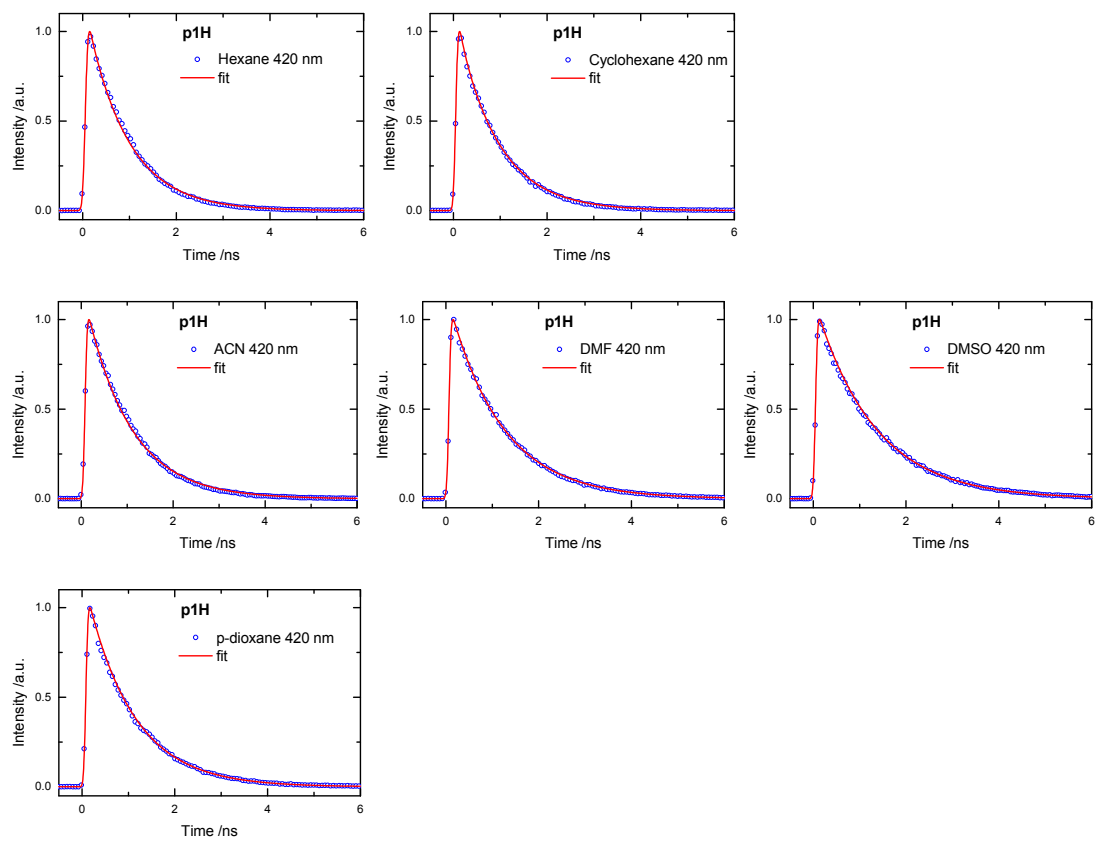

Fig. S5 TCSPC curves measured at emission wavelength 420 nm of p1H in various solvents as indicated



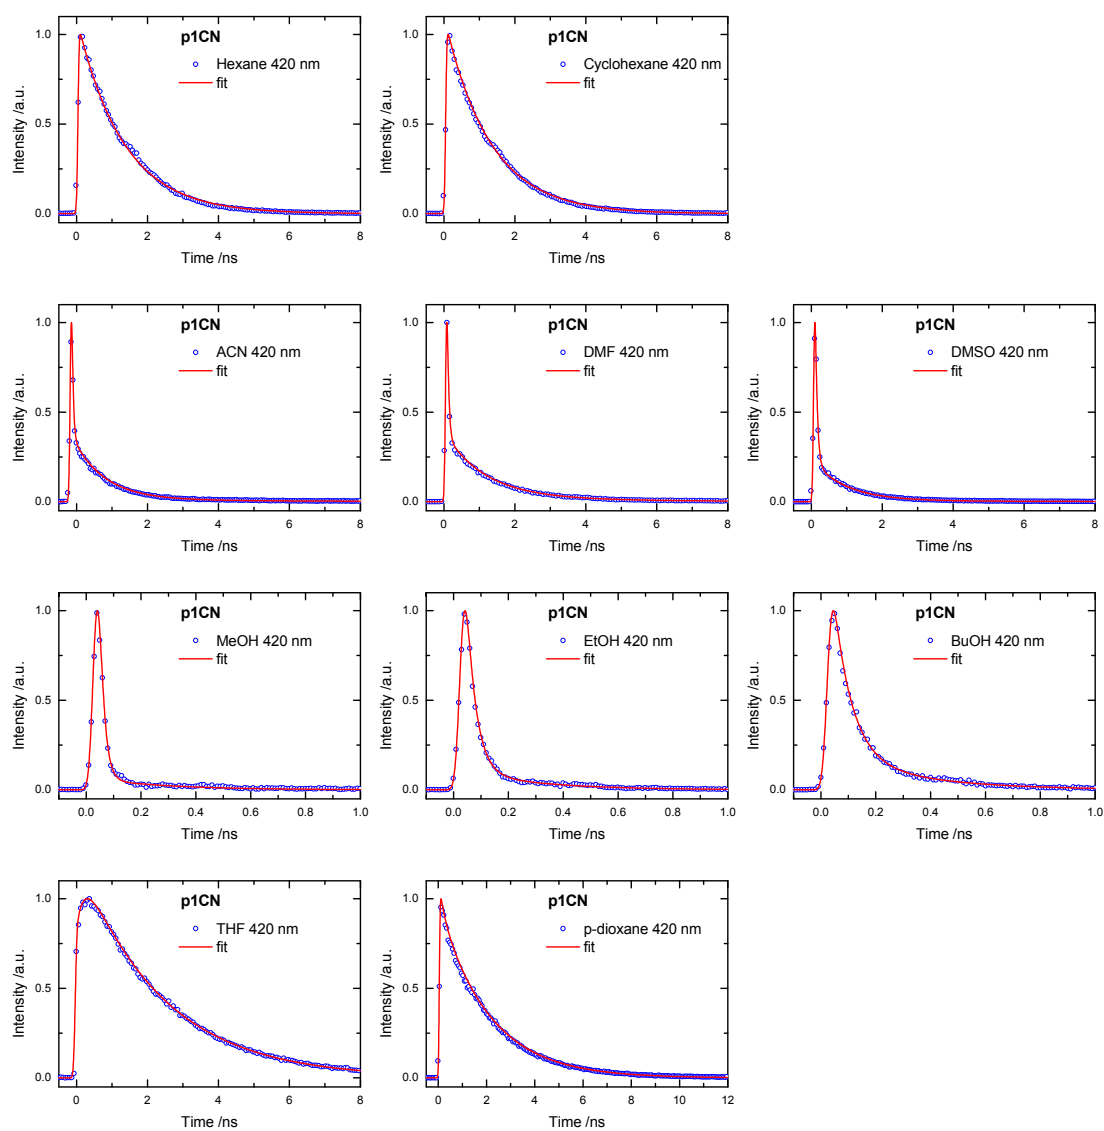

Fig. S6 TCSPC curves measured at emission wavelength 420 nm of p1CN in various solvents as indicated

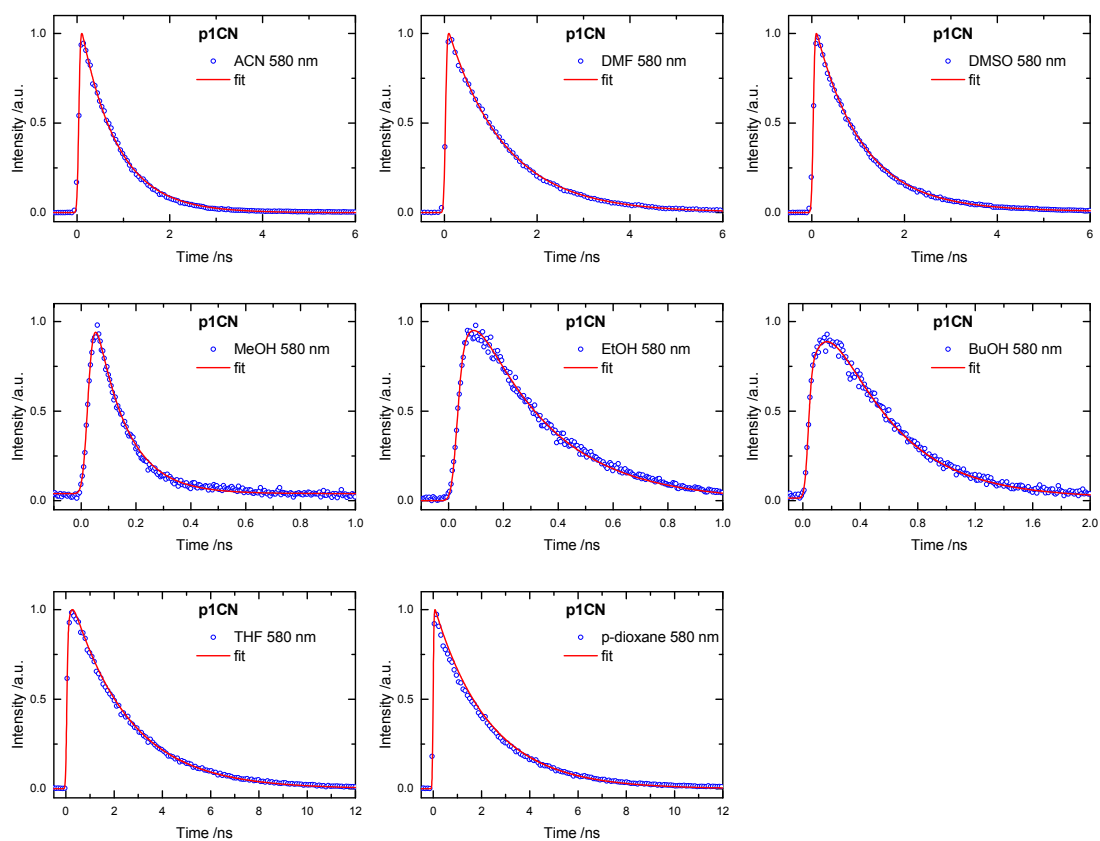

Fig. S7 TCSPC curves measured at emission wavelength 580 nm of p1CN in various solvents as indicated

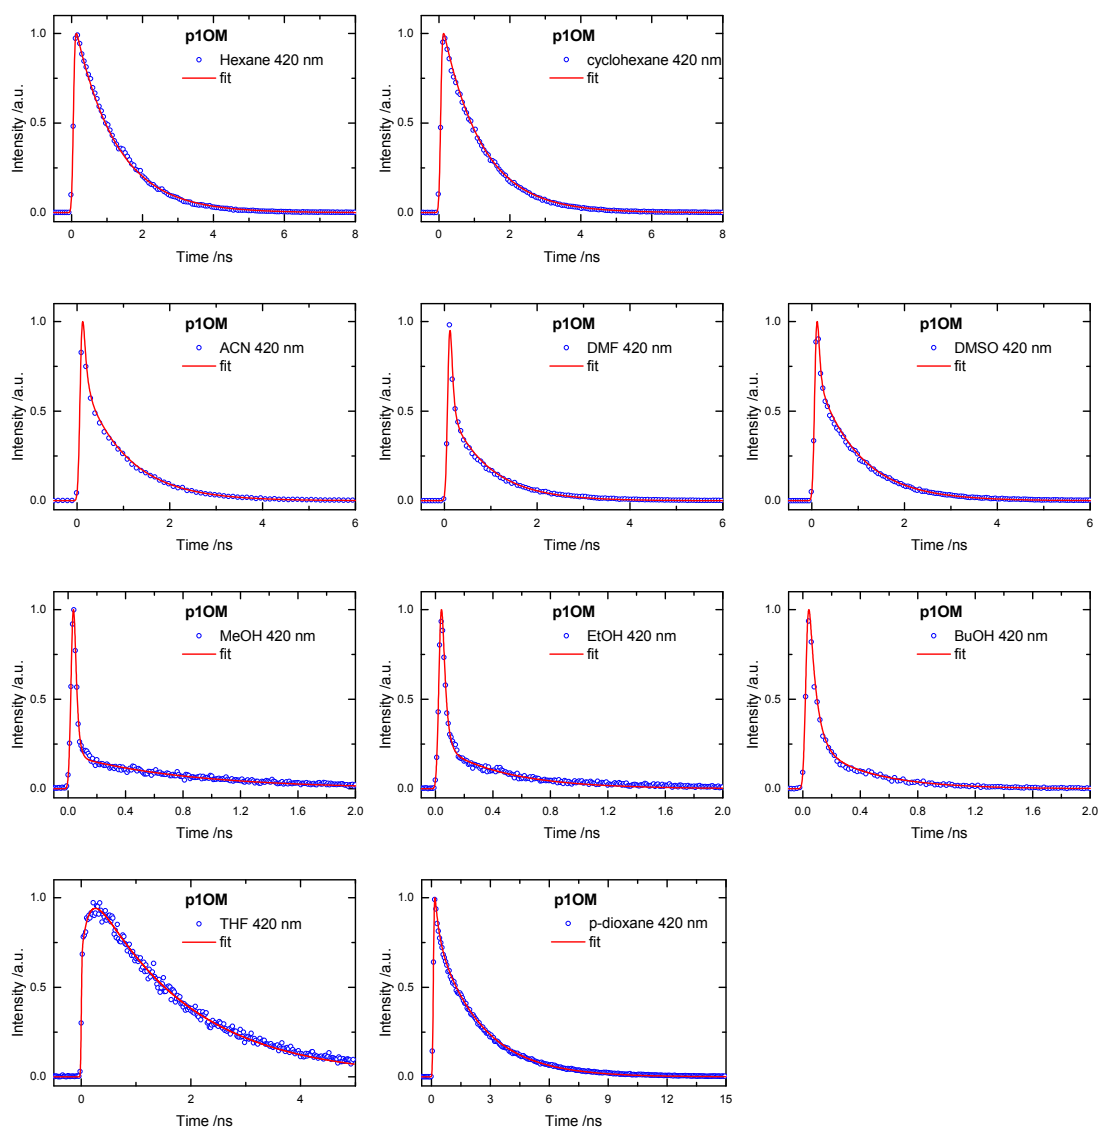

Fig. S8 TCSPC curves measured at emission wavelength 420 nm of p1OM in various solvents as indicated

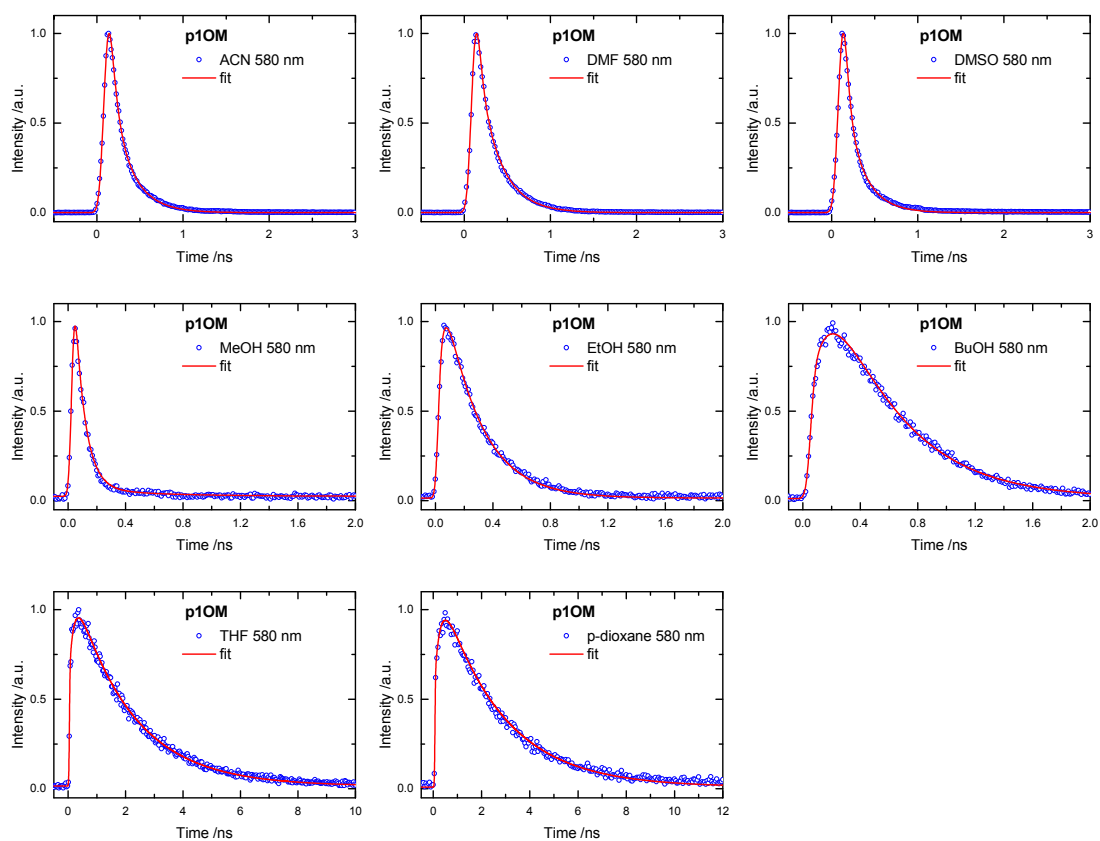

Fig. S9 TCSPC curves measured at emission wavelength 580 nm of p1OM in various solvents as indicated

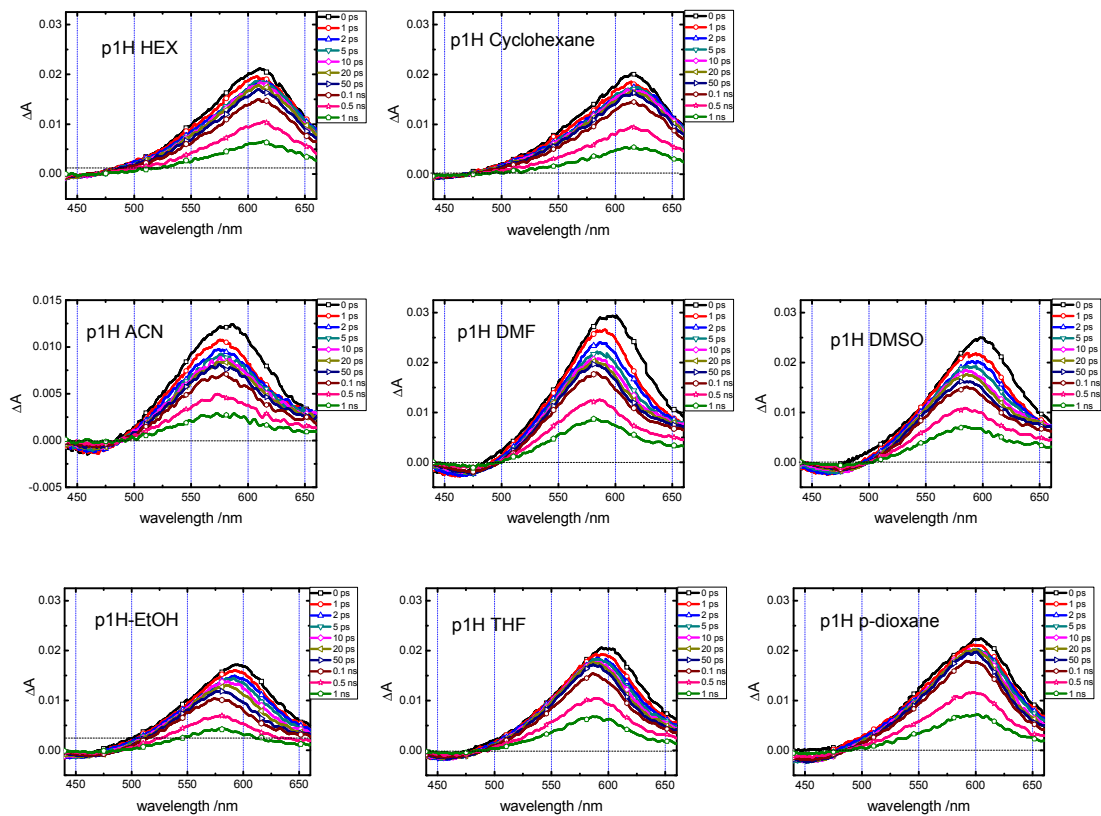

Fig. S10 Transient absorption spectra of p1H in various solvents as indicated.

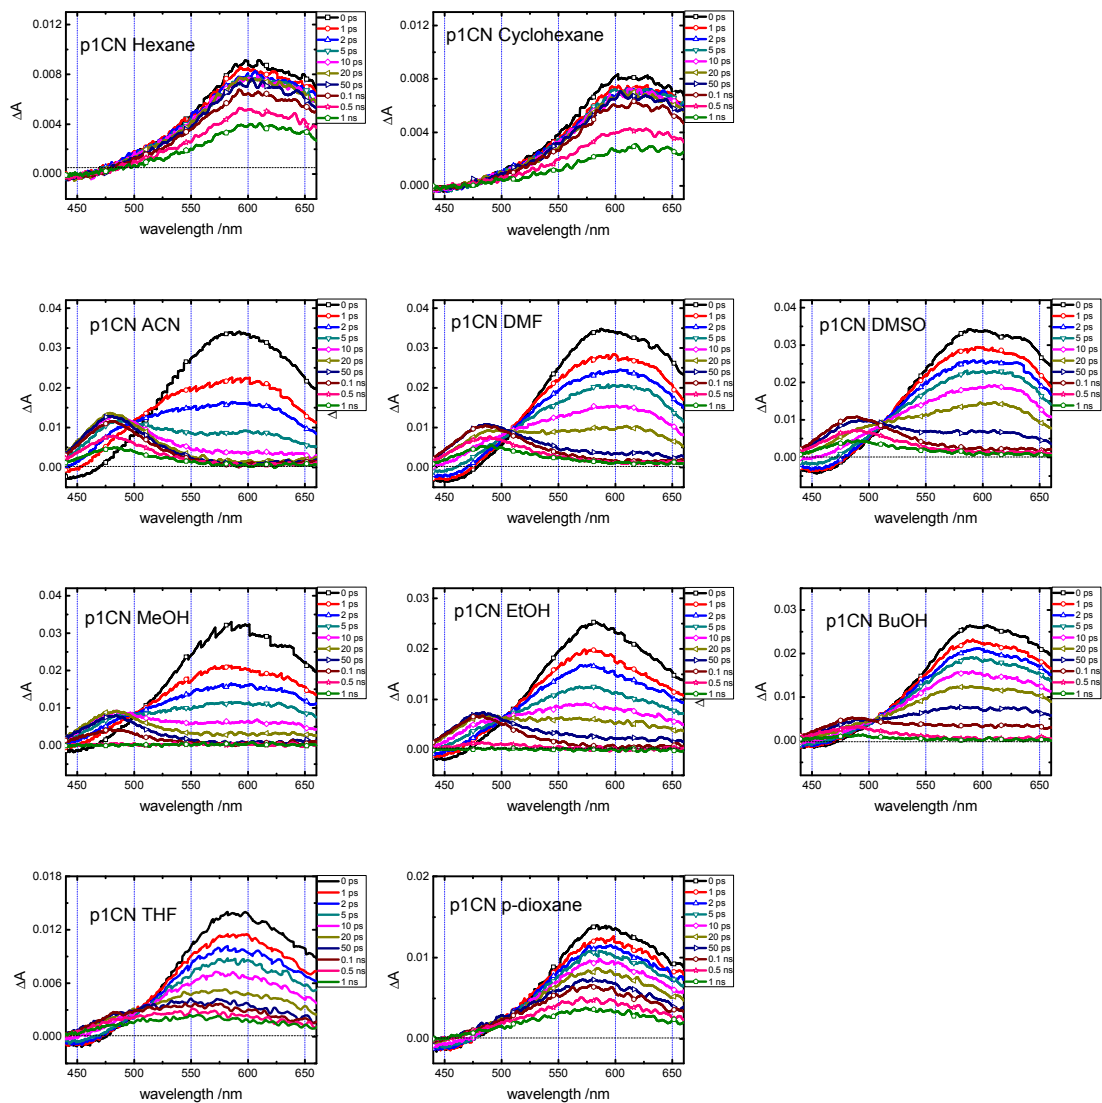

Fig. S11 Transient absorption spectra of p1CN in solvent as indicated

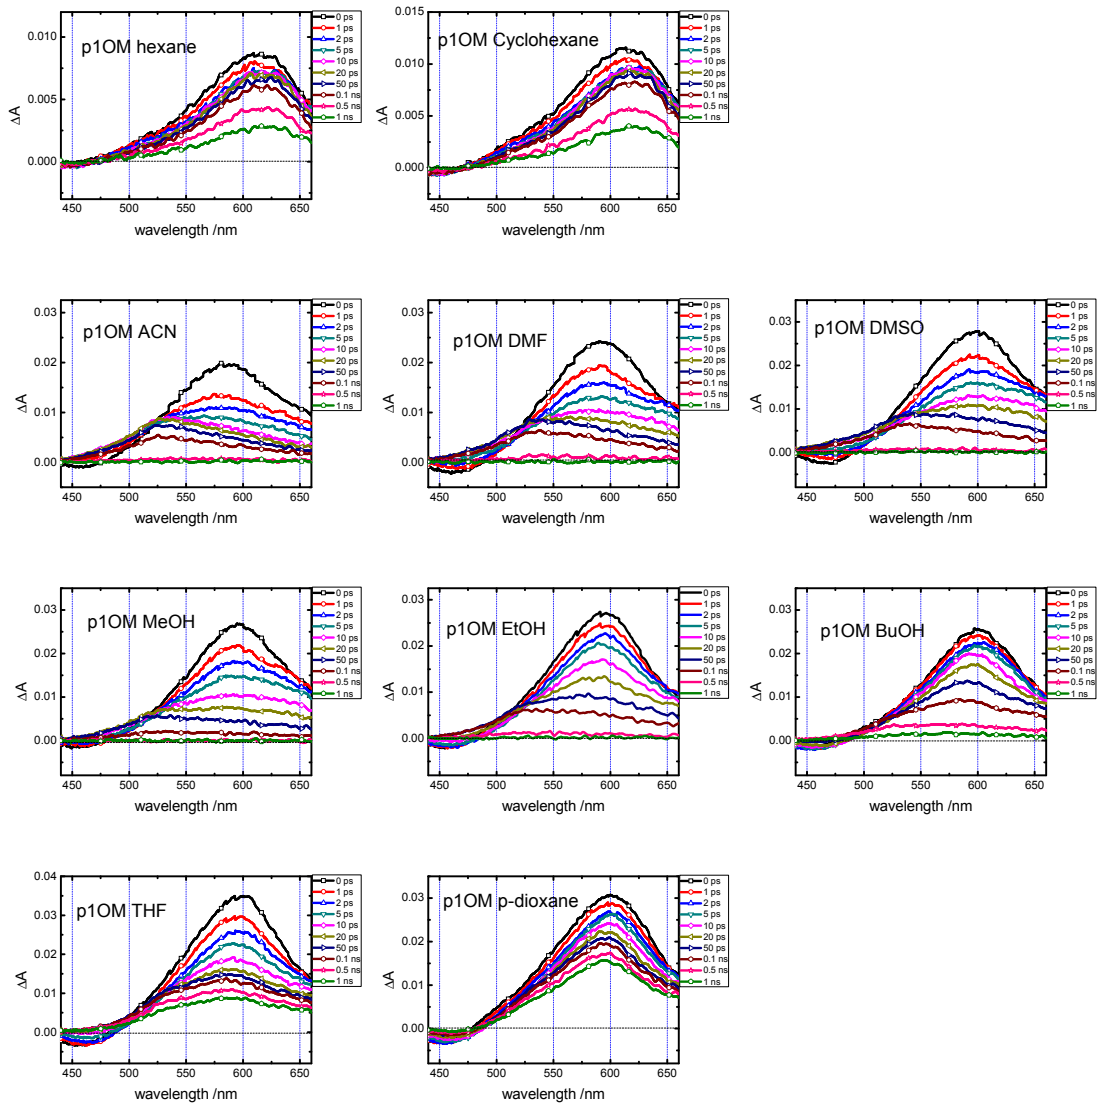

Fig. S12 Transient absorption spectra of p1OM in various solvents as indicated

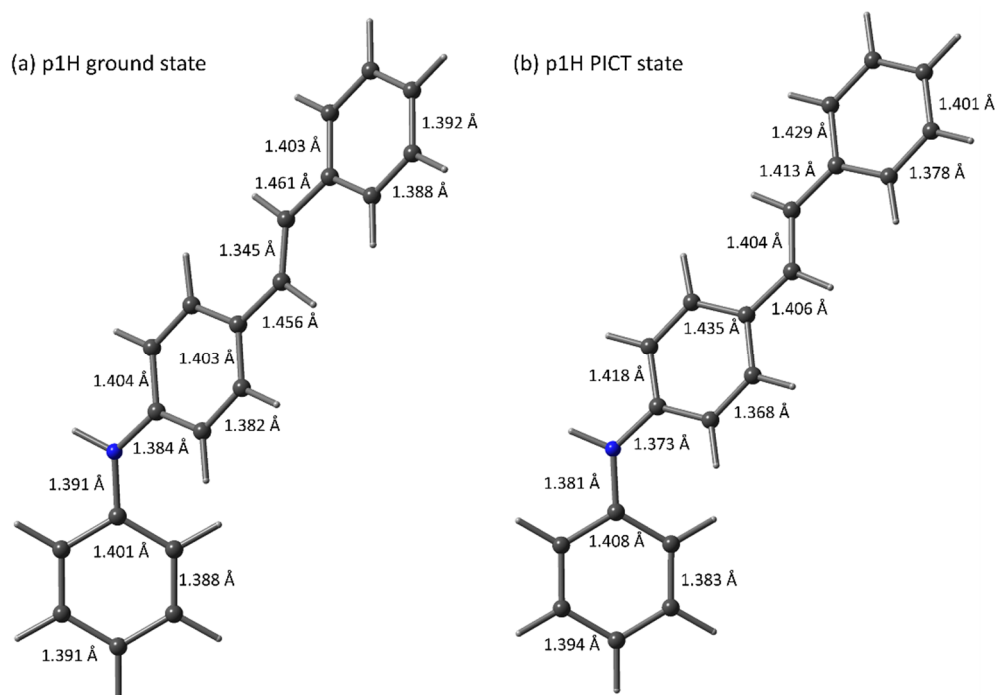

Fig. S13 Calculated optimized molecular structure of p1H in solvent ACN in the ground state (a) and the PICT state (b).

Table S4 Dihedral angle and energy of p1H in solvent ACN.

| state                               | ground state | PICT |
|-------------------------------------|--------------|------|
| $\varphi_{\text{stilbene-aniline}}$ | 41°          | 40°  |
| $\varphi_{\text{NH-aniline}}$       | 22°          | 21°  |
| $\varphi_{\text{NH-stilbene}}$      | 20°          | 20°  |
| energy (eV)                         | 0            | 3.09 |



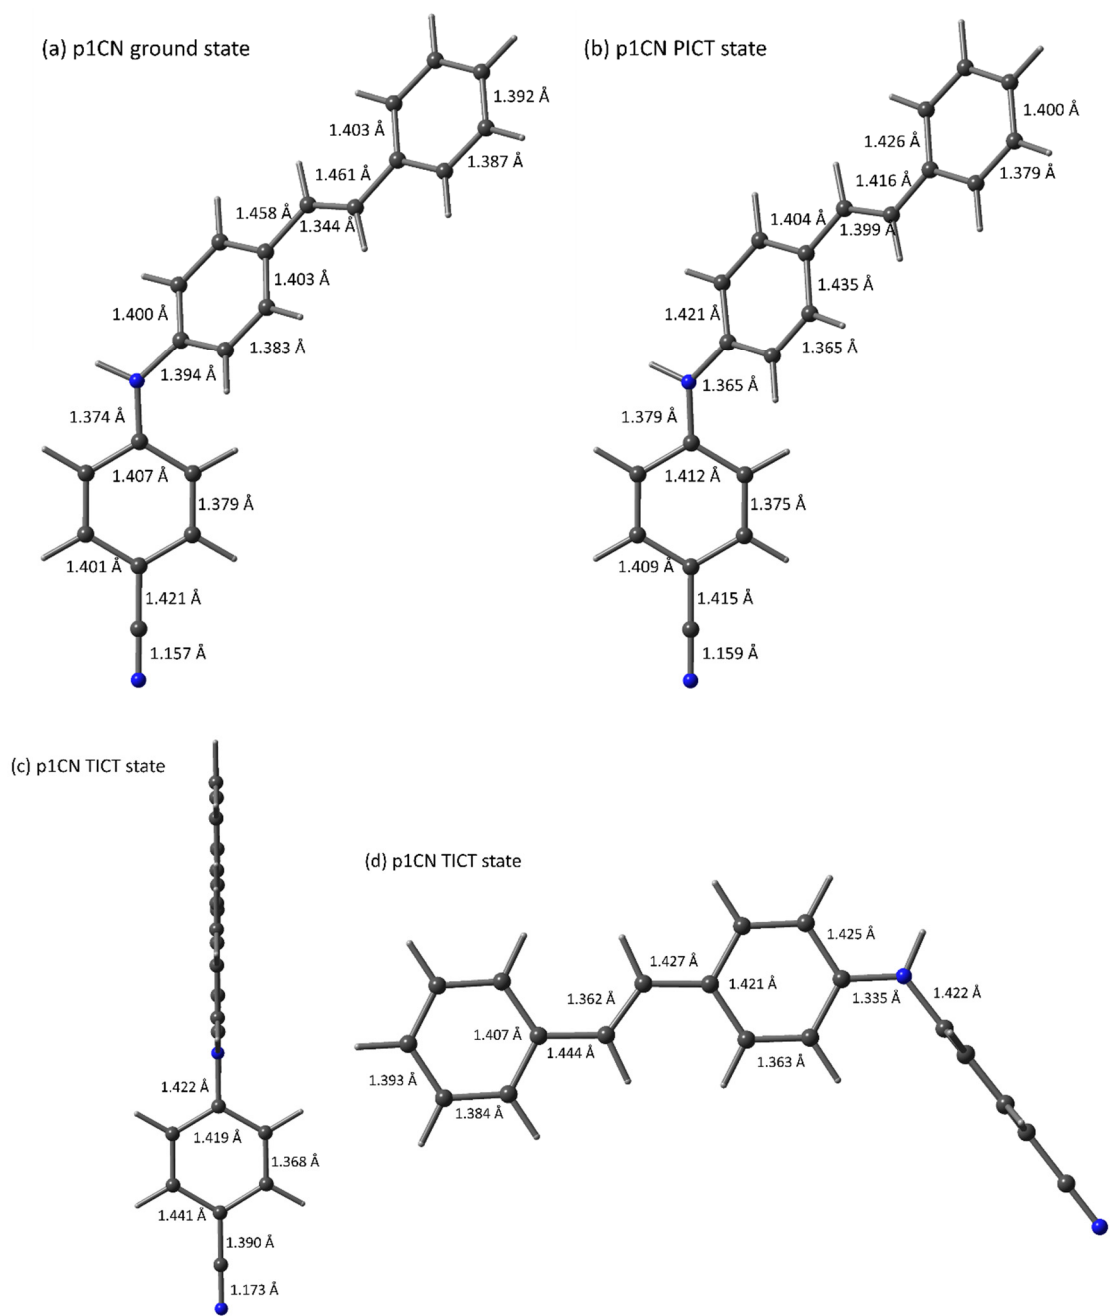

Fig. S14 Calculated, optimized molecular structure of p1CN in solvent ACN in the ground state (a), the PICT state (b) and the TICT state (c),(d).

Table S5 Dihedral angle and energy of p1CN in solvent ACN..

| state                               | ground state | PICT | TICT |
|-------------------------------------|--------------|------|------|
| $\varphi_{\text{stilbene-aniline}}$ | 42°          | 38°  | 90°  |
| $\varphi_{\text{NH-aniline}}$       | 16°          | 22°  | 89°  |
| $\varphi_{\text{NH-stilbene}}$      | 26°          | 17°  | 0°   |
| energy (eV)                         | 0            | 3.13 | 2.78 |

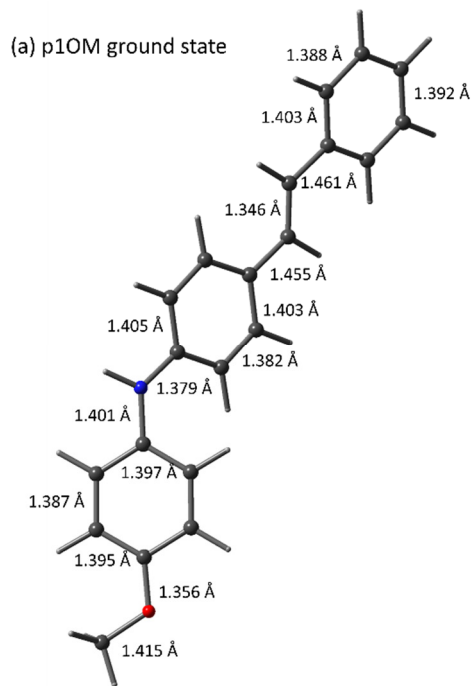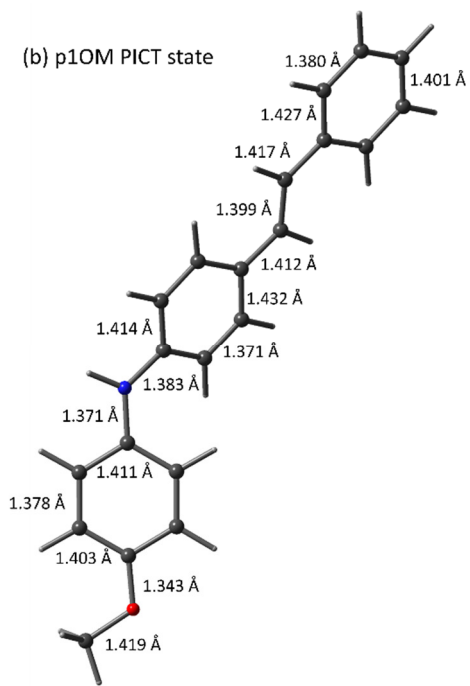

(c) p1OM TICT state

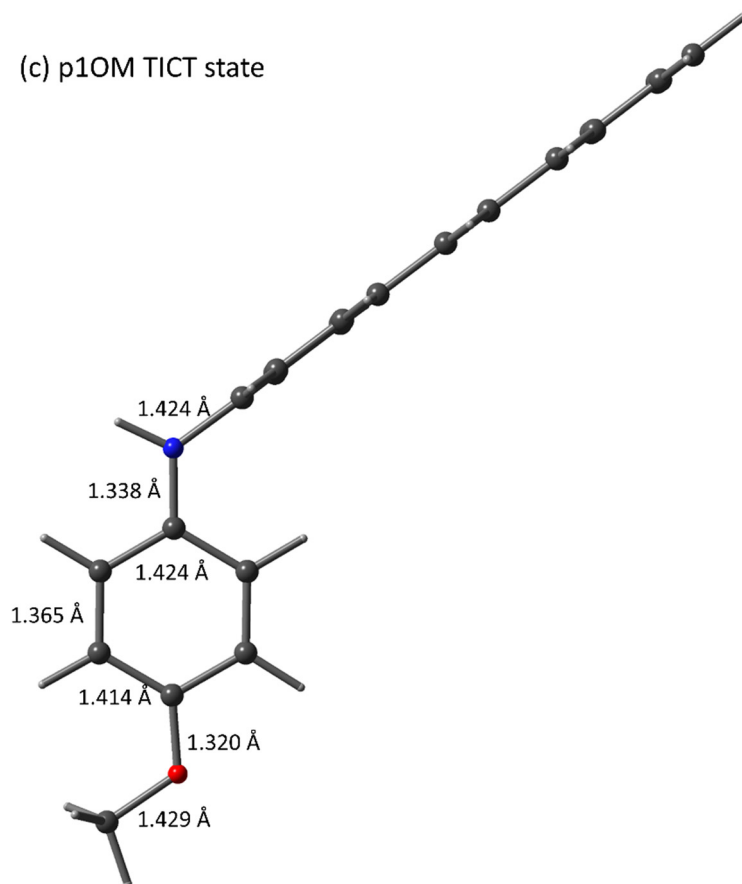

(d) p1OM TICT state

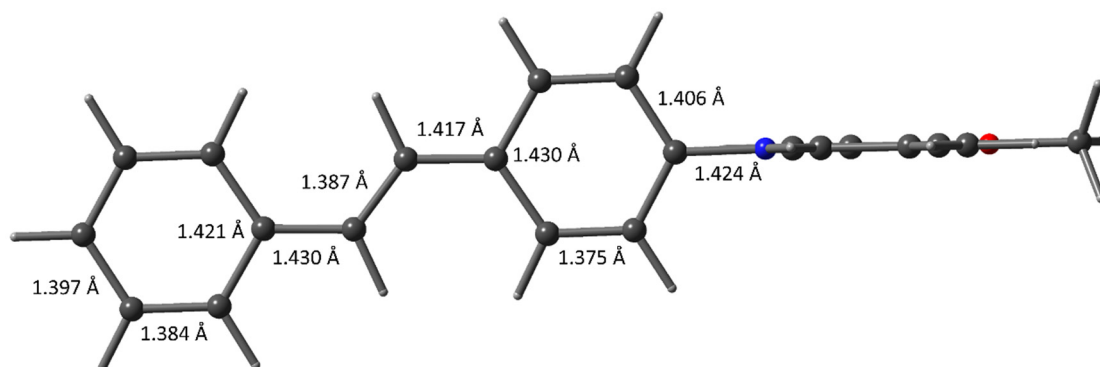

Fig. S15 Calculated, optimized molecular structure of p1OM in solvent ACN in the ground state (a), the PICT state (b) and the TICT state (c),(d).

Table S5 Dihedral angle and energy of p1OM in solvent ACN.

|                                     | ground state | PICT | TICT |
|-------------------------------------|--------------|------|------|
| $\varphi_{\text{stilbene-aniline}}$ | 46°          | 42°  | 84°  |
| $\varphi_{\text{NH-aniline}}$       | 29°          | 18°  | 1°   |
| $\varphi_{\text{NH-stilbene}}$      | 17°          | 25°  | 83°  |
| energy (eV)                         | 0            | 2.77 | 1.88 |

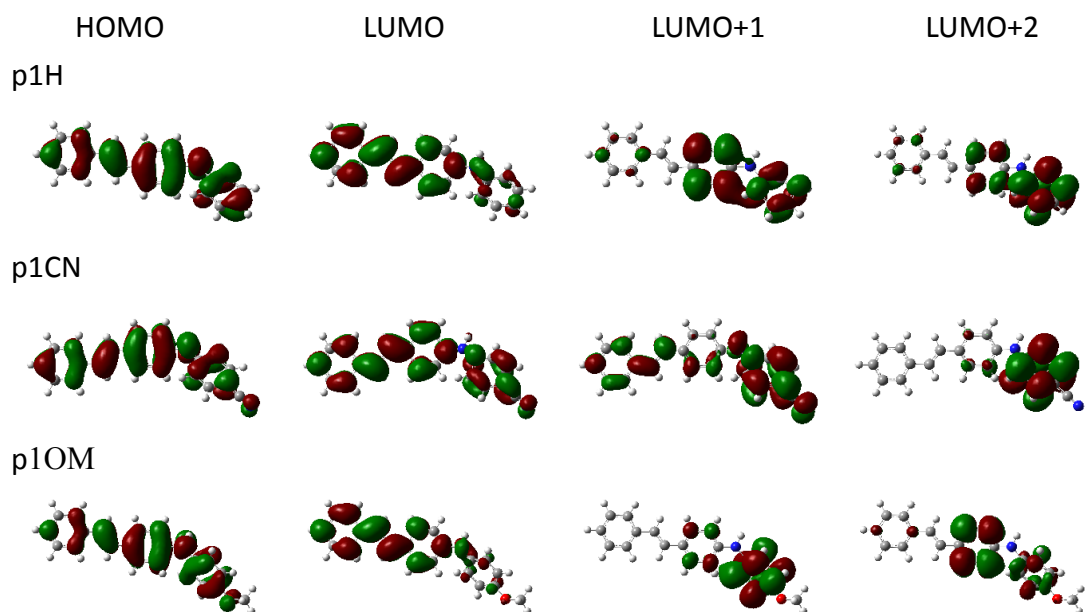

Fig. S16 Molecular orbital diagram HOMO, LUMO, LUMO+1 and LUMO+2 for p1H, p1CN, and p1OM.

Table S7 Vertical transition (eV) and oscillator strength (in parenthesis) of aminostilbenes in solvent ACN.

|                     | p1H             | p1CN            | p1OM            |
|---------------------|-----------------|-----------------|-----------------|
| S1<br>(HOMO→LUMO)   | 3.3014 (1.1944) | 3.3827 (1.4325) | 3.1950 (1.1288) |
| S2<br>(HOMO→LUMO+1) | 4.2037 (0.0242) | 4.1501 (0.0741) | 4.0883 (0.0149) |
| S3<br>(HOMO→LUMO+2) | 4.3247 (0.0208) | 4.2889 (0.0175) | 4.1857 (0.0176) |
